# Supplementary material for: Antimicrobial Diterpenes from Rough Goldenrod (Solidago rugosa Mill.)
Source: MDPI journal article supplement (doi:10.3390/molecules28093790), 2023-04-28
Supplement: s1 [file s1]

# Supplementary Material

## Antimicrobial Diterpenes from Rough Goldenrod (*Solidago rugosa* Mill.)

Márton Baglyas<sup>1,2</sup>, Péter G. Ott<sup>1</sup>, Ildikó Schwarczinger<sup>1</sup>, Judit Kolozsváriné Nagy<sup>1</sup>, András Darcsi<sup>3</sup>, József Bakonyi<sup>1</sup>, Ágnes M. Móricz<sup>1,\*</sup>

<sup>1</sup>Plant Protection Institute, Centre for Agricultural Research, ELKH, Herman O. Str. 15, 1022 Budapest, Hungary

<sup>2</sup>Doctoral School of Pharmaceutical Sciences, Semmelweis University, Hőgyes E. Str. 7–9, 1092 Budapest, Hungary

<sup>3</sup>Pharmaceutical Chemistry and Technology Department, National Institute of Pharmacy and Nutrition, Szabolcs Str. 33, 1135 Budapest, Hungary

\* Correspondence: moricz.agnes@atk.hu

## Table of contents

| No.                | Legend                                                                                                                                            | Page |
|--------------------|---------------------------------------------------------------------------------------------------------------------------------------------------|------|
| <b>Figure S1.</b>  | <sup>1</sup> H NMR spectrum of (–)-hardwickiic acid ( <b>1</b> ) (CD <sub>3</sub> OD, 600 MHz).                                                   | S-4  |
| <b>Figure S2.</b>  | <sup>1</sup> H NMR spectrum of (–)-hardwickiic acid ( <b>1</b> ) (CD <sub>3</sub> OD, 600 MHz, aliphatic region).                                 | S-5  |
| <b>Figure S3.</b>  | <sup>13</sup> C NMR spectrum of (–)-hardwickiic acid ( <b>1</b> ) (CD <sub>3</sub> OD, 151 MHz).                                                  | S-6  |
| <b>Figure S4.</b>  | <sup>13</sup> C NMR spectrum of (–)-hardwickiic acid ( <b>1</b> ) (CD <sub>3</sub> OD, 151 MHz, aliphatic region).                                | S-7  |
| <b>Figure S5.</b>  | <sup>1</sup> H– <sup>1</sup> H COSY NMR spectrum of (–)-hardwickiic acid ( <b>1</b> ) (CD <sub>3</sub> OD, 600 MHz).                              | S-8  |
| <b>Figure S6.</b>  | <sup>1</sup> H– <sup>1</sup> H COSY NMR spectrum of (–)-hardwickiic acid ( <b>1</b> ) (CD <sub>3</sub> OD, 600 MHz, aliphatic region).            | S-9  |
| <b>Figure S7.</b>  | <sup>1</sup> H– <sup>13</sup> C edHSQC NMR spectrum of (–)-hardwickiic acid ( <b>1</b> ) (CD <sub>3</sub> OD, 600 and 151 MHz).                   | S-10 |
| <b>Figure S8.</b>  | <sup>1</sup> H– <sup>13</sup> C edHSQC NMR spectrum of (–)-hardwickiic acid ( <b>1</b> ) (CD <sub>3</sub> OD, 600 and 151 MHz, aliphatic region). | S-11 |
| <b>Figure S9.</b>  | <sup>1</sup> H– <sup>13</sup> C HMBC NMR spectrum of (–)-hardwickiic acid ( <b>1</b> ) (CD <sub>3</sub> OD, 600 and 151 MHz).                     | S-12 |
| <b>Figure S10.</b> | <sup>1</sup> H– <sup>13</sup> C HMBC NMR spectrum of (–)-hardwickiic acid ( <b>1</b> ) (CD <sub>3</sub> OD, 600 and 151 MHz, aliphatic region).   | S-13 |
| <b>Figure S11.</b> | <sup>1</sup> H– <sup>1</sup> H TOCSY NMR spectrum of (–)-hardwickiic acid ( <b>1</b> ) (CD <sub>3</sub> OD, 600 MHz).                             | S-14 |
| <b>Figure S12.</b> | <sup>1</sup> H– <sup>1</sup> H TOCSY NMR spectrum of (–)-hardwickiic acid ( <b>1</b> ) (CD <sub>3</sub> OD, 600 MHz, aliphatic region).           | S-15 |
| <b>Figure S13.</b> | <sup>1</sup> H– <sup>1</sup> H NOESY NMR spectrum of (–)-hardwickiic acid ( <b>1</b> ) (CD <sub>3</sub> OD, 600 MHz).                             | S-16 |
| <b>Figure S14.</b> | <sup>1</sup> H– <sup>1</sup> H NOESY NMR spectrum of (–)-hardwickiic acid ( <b>1</b> ) (CD <sub>3</sub> OD, 600 MHz, aliphatic region).           | S-17 |
| <b>Figure S15.</b> | <sup>1</sup> H NMR spectrum of (–)-abietic acid ( <b>2</b> ) (CD <sub>3</sub> OD, 600 MHz).                                                       | S-18 |
| <b>Figure S16.</b> | <sup>1</sup> H NMR spectrum of (–)-abietic acid ( <b>2</b> ) (CD <sub>3</sub> OD, 600 MHz, aliphatic region).                                     | S-19 |
| <b>Figure S17.</b> | <sup>13</sup> C NMR spectrum of (–)-abietic acid ( <b>2</b> ) (CD <sub>3</sub> OD, 151 MHz).                                                      | S-20 |
| <b>Figure S18.</b> | <sup>13</sup> C NMR spectrum of (–)-abietic acid ( <b>2</b> ) (CD <sub>3</sub> OD, 151 MHz, aliphatic region).                                    | S-21 |
| <b>Figure S19.</b> | <sup>1</sup> H– <sup>1</sup> H COSY NMR spectrum of (–)-abietic acid ( <b>2</b> ) (CD <sub>3</sub> OD, 600 MHz).                                  | S-22 |
| <b>Figure S20.</b> | <sup>1</sup> H– <sup>1</sup> H COSY NMR spectrum of (–)-abietic acid ( <b>2</b> ) (CD <sub>3</sub> OD, 600 MHz, aliphatic region).                | S-23 |
| <b>Figure S21.</b> | <sup>1</sup> H– <sup>13</sup> C edHSQC NMR spectrum of (–)-abietic acid ( <b>2</b> ) (CD <sub>3</sub> OD, 600 and 151 MHz).                       | S-24 |
| <b>Figure S22.</b> | <sup>1</sup> H– <sup>13</sup> C edHSQC NMR spectrum of (–)-abietic acid ( <b>2</b> ) (CD <sub>3</sub> OD, 600 and 151 MHz, aliphatic region).     | S-25 |
| <b>Figure S23.</b> | <sup>1</sup> H– <sup>13</sup> C bsHSQC NMR spectrum of (–)-abietic acid ( <b>2</b> ) (CD <sub>3</sub> OD, 600 and 151 MHz).                       | S-26 |
| <b>Figure S24.</b> | <sup>1</sup> H– <sup>13</sup> C bsHSQC NMR spectrum of (–)-abietic acid ( <b>2</b> ) (CD <sub>3</sub> OD, 600 and 151 MHz, aliphatic region).     | S-27 |
| <b>Figure S25.</b> | <sup>1</sup> H– <sup>13</sup> C HMBC NMR spectrum of (–)-abietic acid ( <b>2</b> ) (CD <sub>3</sub> OD, 600 and 151 MHz).                         | S-28 |

|                    |                                                                                                                                                    |      |
|--------------------|----------------------------------------------------------------------------------------------------------------------------------------------------|------|
| <b>Figure S26.</b> | $^1\text{H}$ - $^{13}\text{C}$ HMBC NMR spectrum of (–)-abietic acid ( <b>2</b> ) ( $\text{CD}_3\text{OD}$ , 600 and 151 MHz, aliphatic region).   | S-29 |
| <b>Figure S27.</b> | $^1\text{H}$ - $^{13}\text{C}$ bsHMBC NMR spectrum of (–)-abietic acid ( <b>2</b> ) ( $\text{CD}_3\text{OD}$ , 600 and 151 MHz).                   | S-30 |
| <b>Figure S28.</b> | $^1\text{H}$ - $^{13}\text{C}$ bsHMBC NMR spectrum of (–)-abietic acid ( <b>2</b> ) ( $\text{CD}_3\text{OD}$ , 600 and 151 MHz, aliphatic region). | S-31 |
| <b>Figure S29.</b> | $^1\text{H}$ - $^1\text{H}$ TOCSY NMR spectrum of (–)-abietic acid ( <b>2</b> ) ( $\text{CD}_3\text{OD}$ , 600 MHz).                               | S-32 |
| <b>Figure S30.</b> | $^1\text{H}$ - $^1\text{H}$ TOCSY NMR spectrum of (–)-abietic acid ( <b>2</b> ) ( $\text{CD}_3\text{OD}$ , 600 MHz, aliphatic region).             | S-33 |

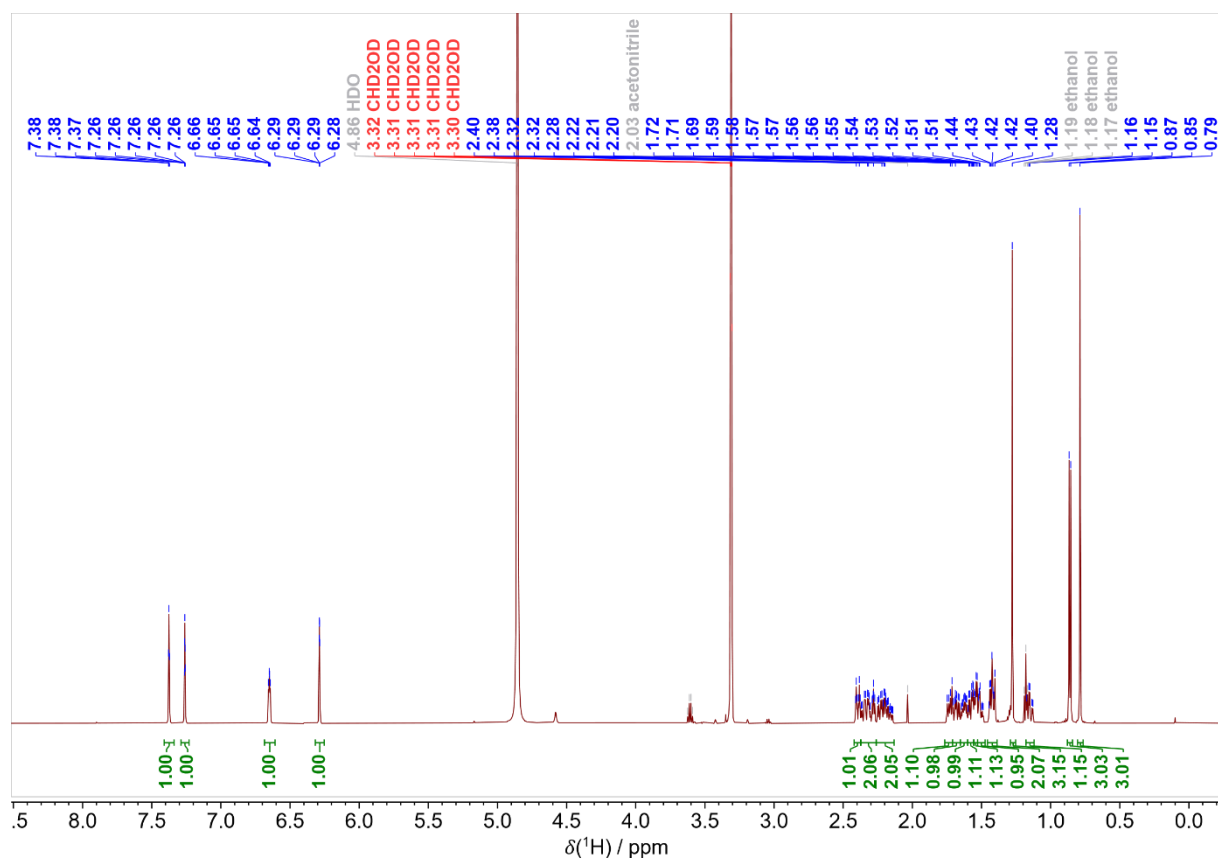

**Figure S1.**  $^1\text{H}$  NMR spectrum of (–)-hardwickiic acid (**1**) ( $\text{CD}_3\text{OD}$ , 600 MHz).

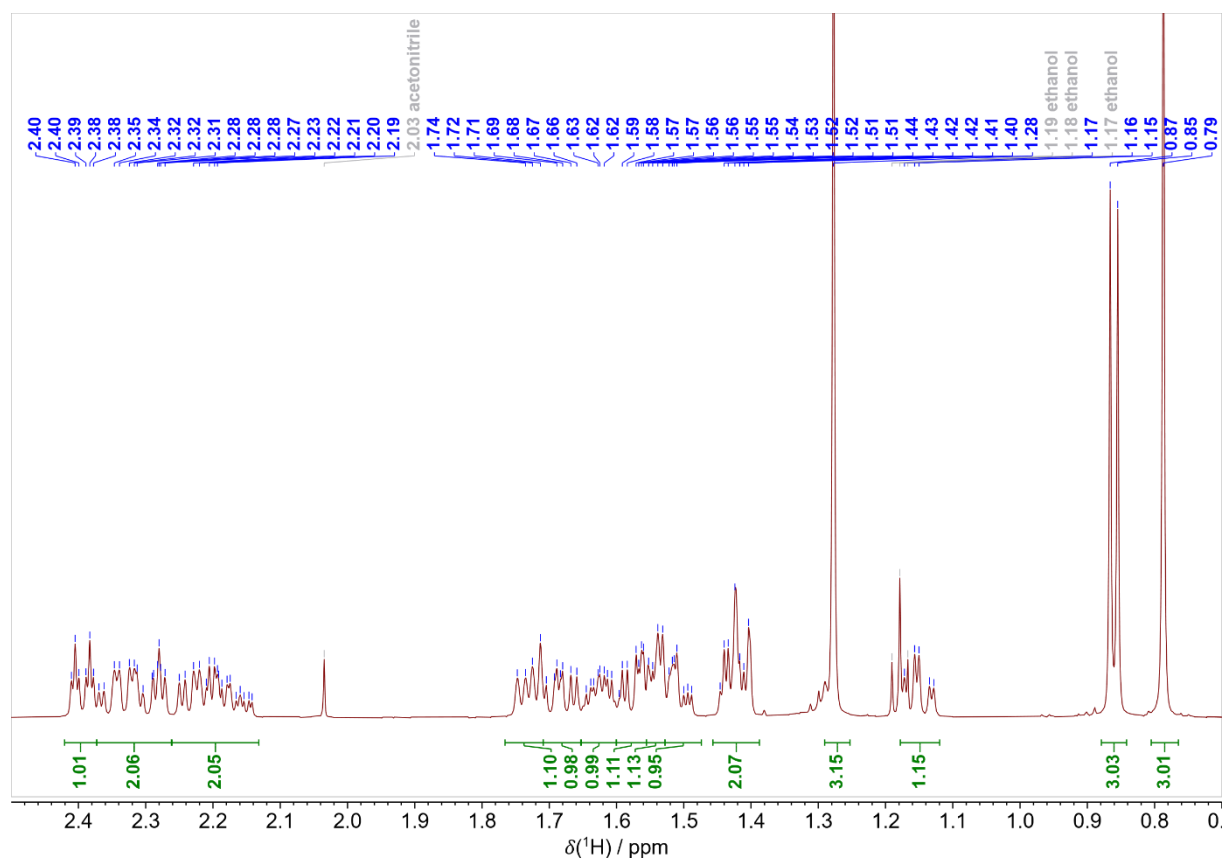

**Figure S2.**  $^1\text{H}$  NMR spectrum of (–)-hardwickiic acid (**1**) ( $\text{CD}_3\text{OD}$ , 600 MHz, aliphatic region).

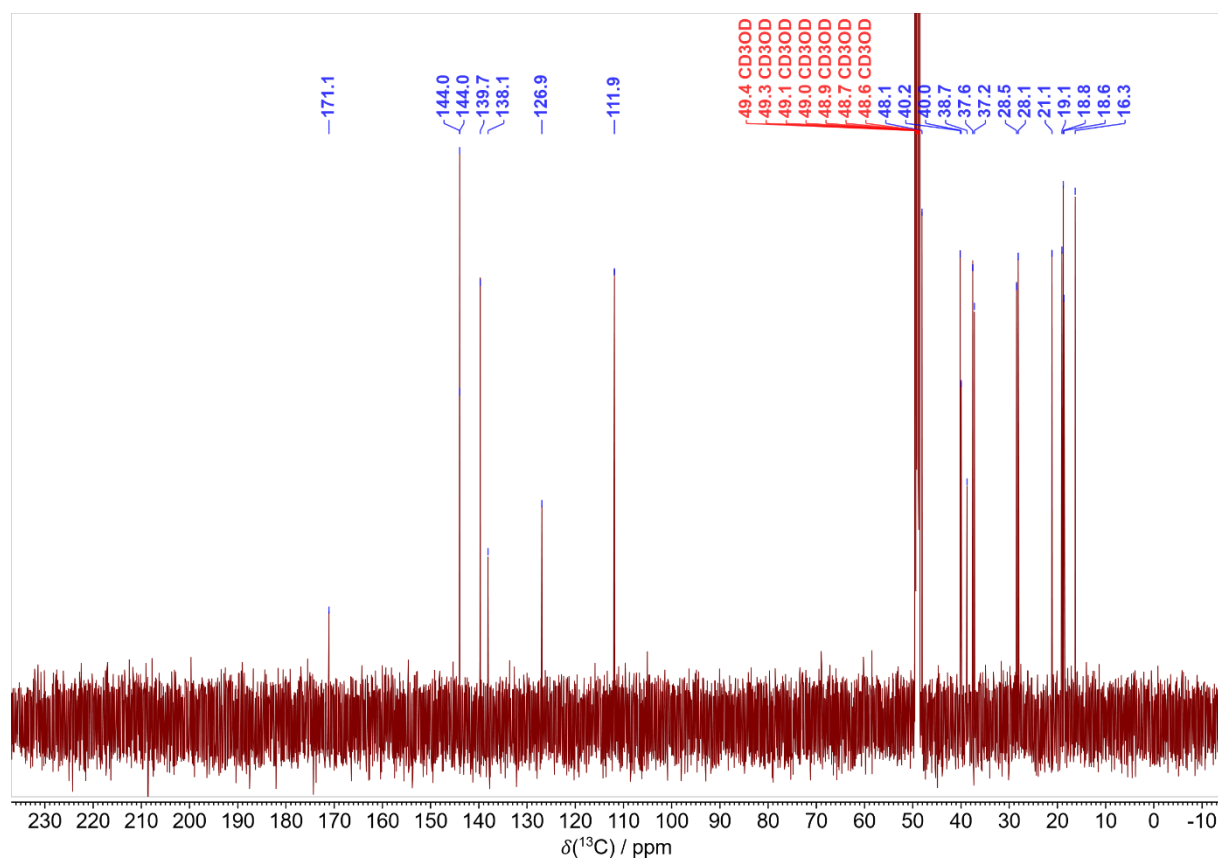

**Figure S3.**  $^{13}\text{C}$  NMR spectrum of (-)-hardwickiic acid (**1**) ( $\text{CD}_3\text{OD}$ , 151 MHz).

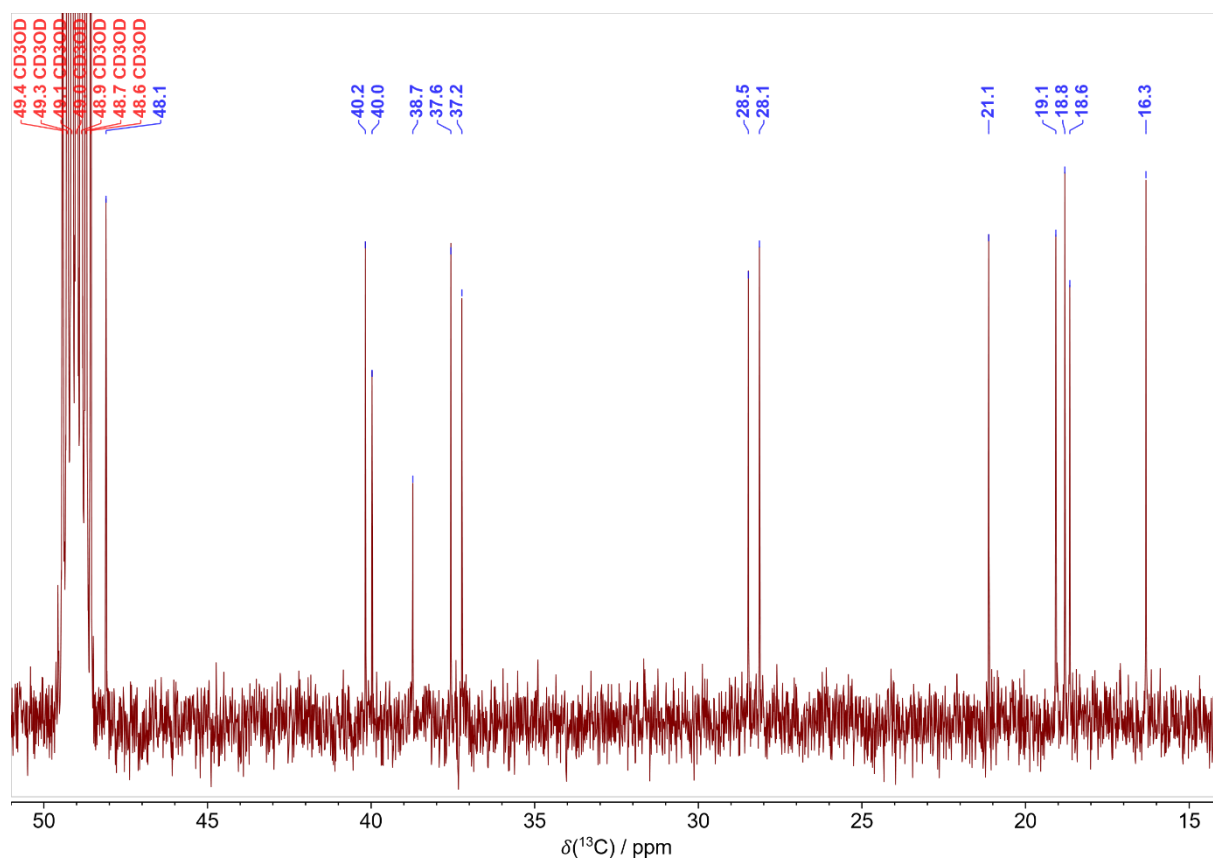

**Figure S4.**  $^{13}\text{C}$  NMR spectrum of (–)-hardwickiic acid (**1**) ( $\text{CD}_3\text{OD}$ , 151 MHz, aliphatic region).

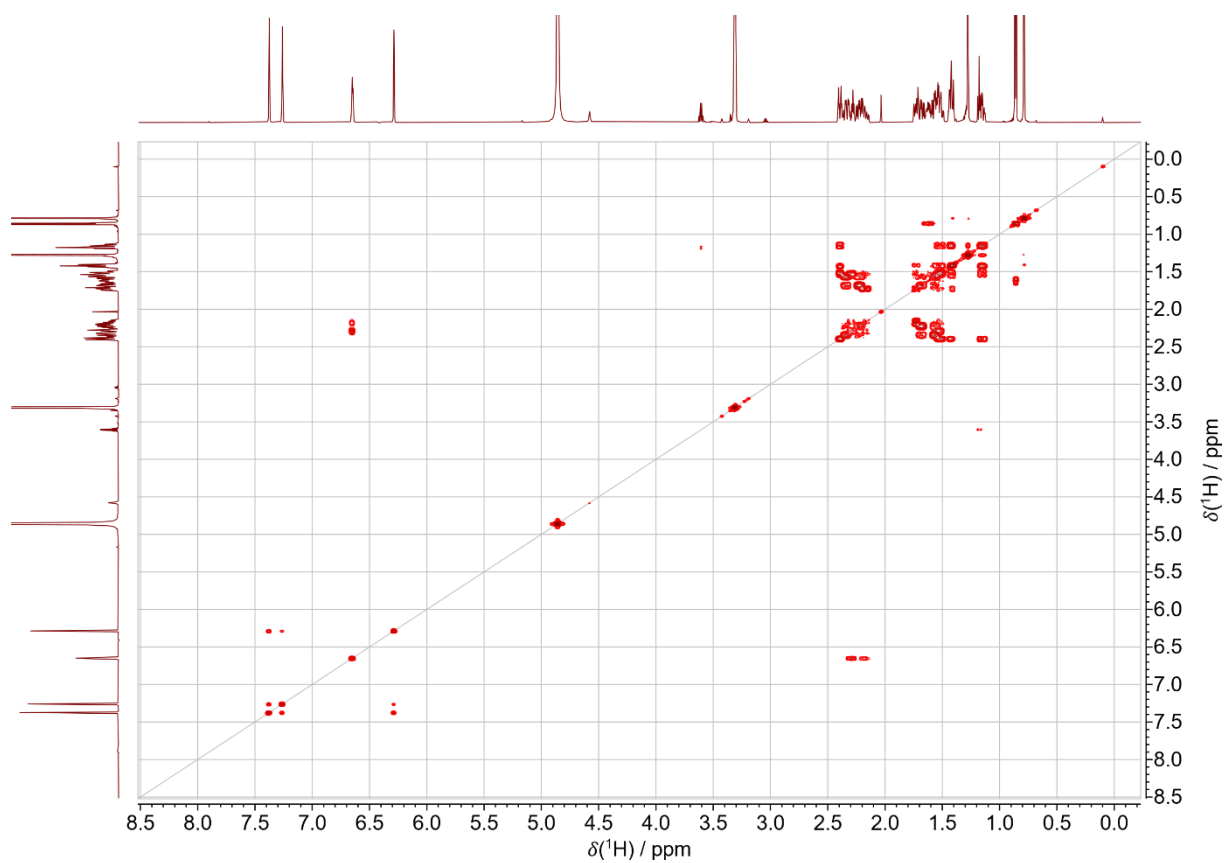

**Figure S5.**  $^1\text{H}$ – $^1\text{H}$  COSY NMR spectrum of (–)-hardwickiic acid (**1**) ( $\text{CD}_3\text{OD}$ , 600 MHz).

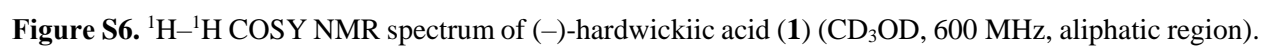

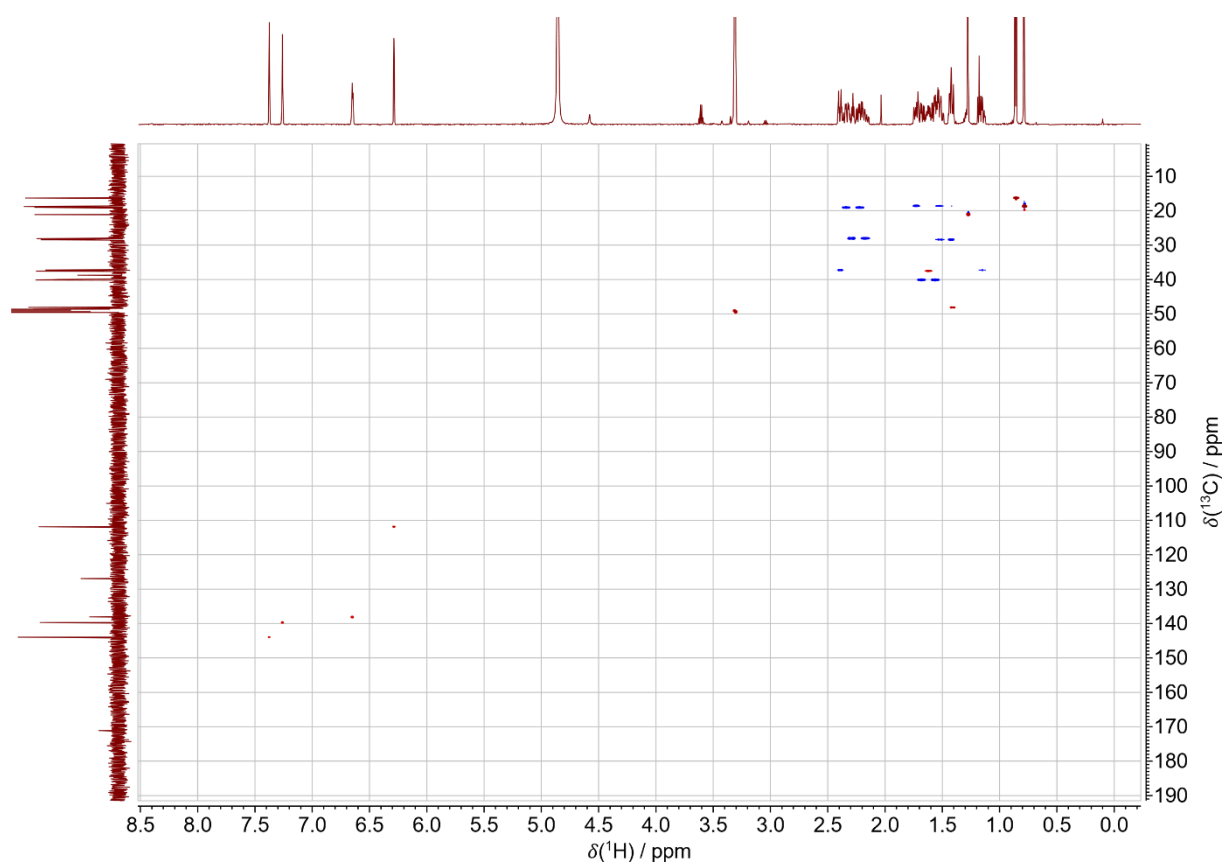

**Figure S7.**  $^1\text{H}$ – $^{13}\text{C}$  edHSQC NMR spectrum of (–)-hardwickiic acid (**1**) ( $\text{CD}_3\text{OD}$ , 600 and 151 MHz).

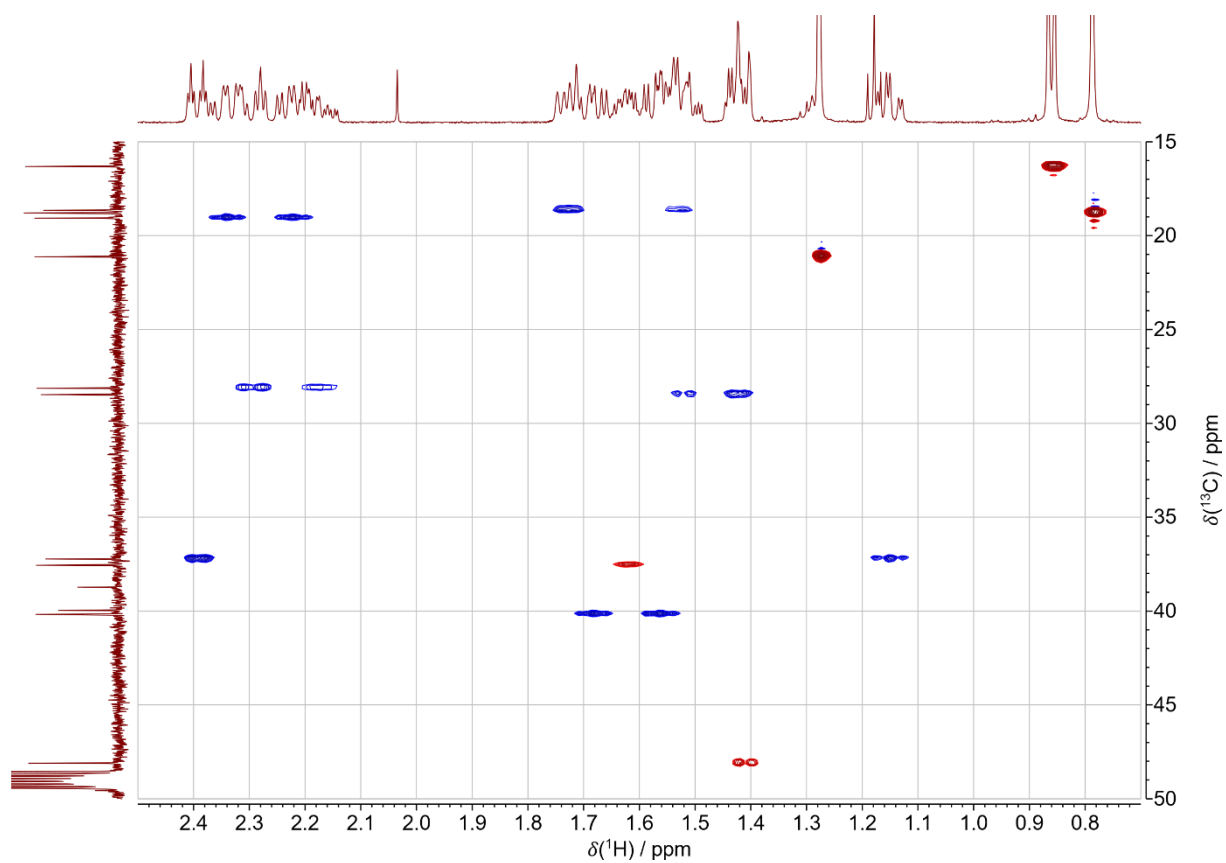

**Figure S8.**  $^1\text{H}$ - $^{13}\text{C}$  edHSQC NMR spectrum of (–)-hardwickiic acid (**1**) ( $\text{CD}_3\text{OD}$ , 600 and 151 MHz, aliphatic region).

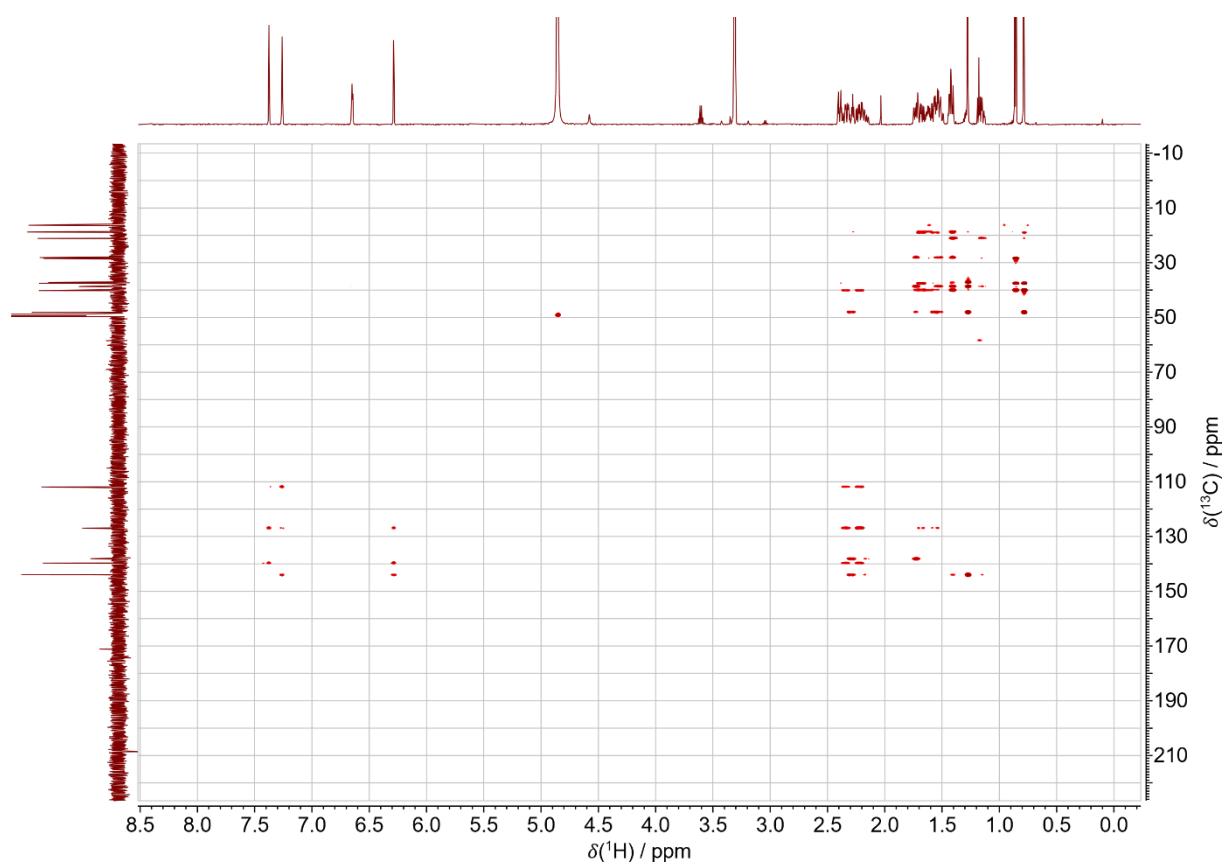

**Figure S9.**  $^1\text{H}$ – $^{13}\text{C}$  HMBC NMR spectrum of (–)-hardwickiic acid (**1**) ( $\text{CD}_3\text{OD}$ , 600 and 151 MHz).

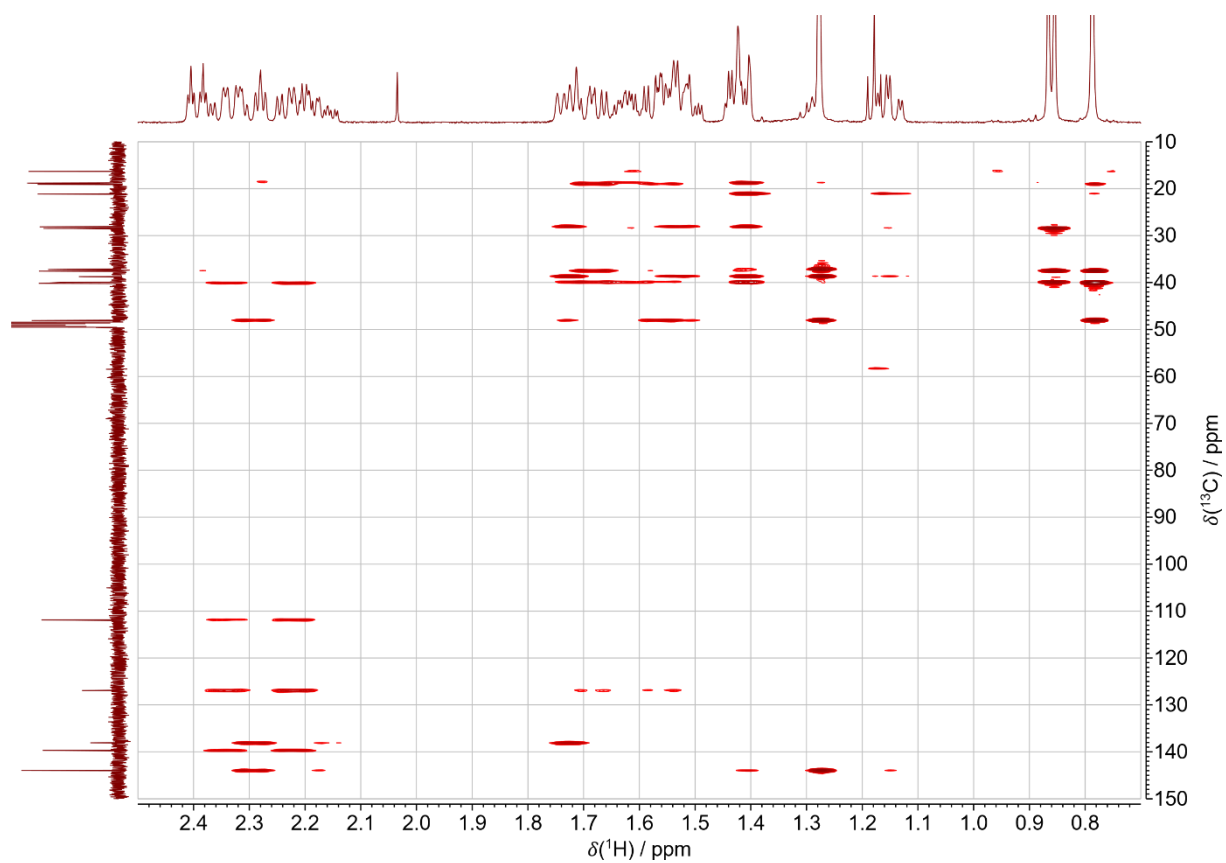

**Figure S10.**  $^1\text{H}$ - $^{13}\text{C}$  HMBC NMR spectrum of (–)-hardwickiic acid (**1**) ( $\text{CD}_3\text{OD}$ , 600 and 151 MHz, aliphatic region).

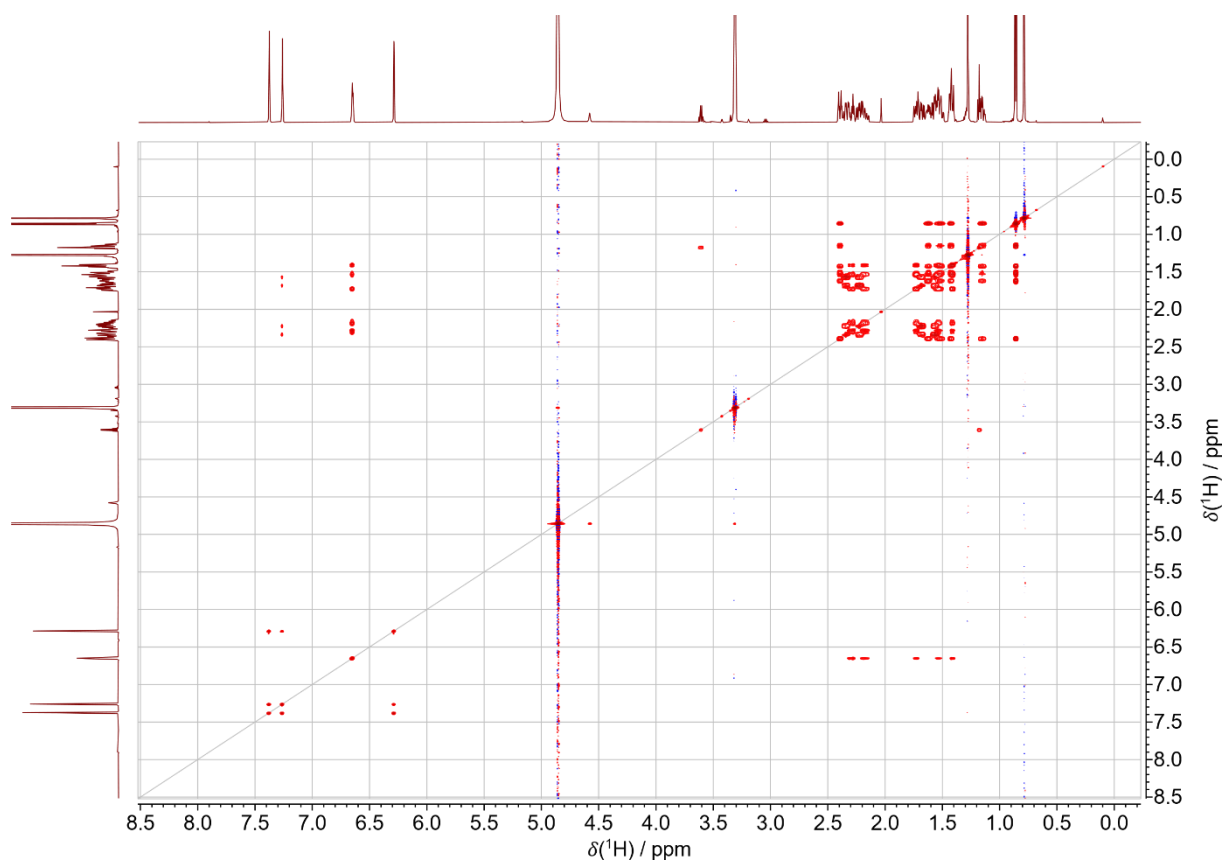

**Figure S11.**  $^1\text{H}$ - $^1\text{H}$  TOCSY NMR spectrum of (–)-hardwickiic acid (**1**) ( $\text{CD}_3\text{OD}$ , 600 MHz).

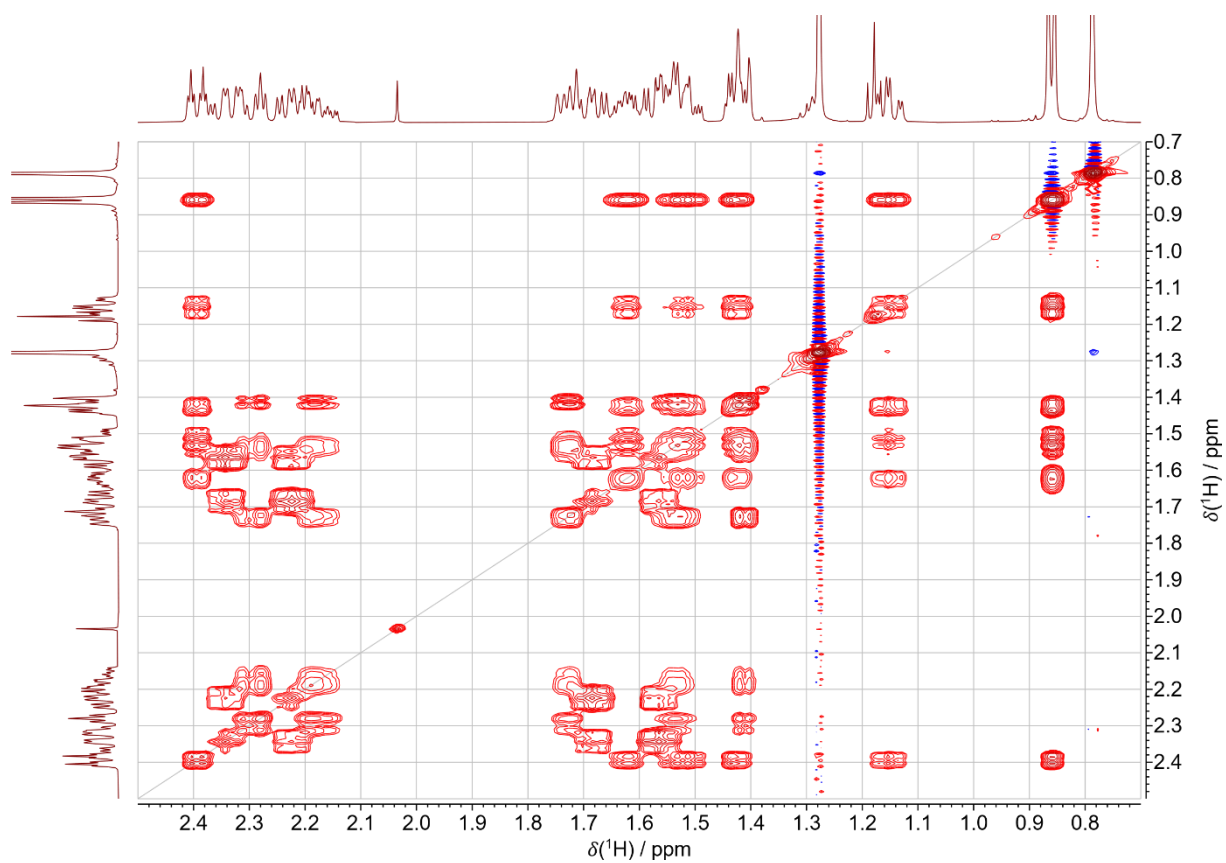

**Figure S12.**  $^1\text{H}$ - $^1\text{H}$  TOCSY NMR spectrum of (–)-hardwickiic acid (**1**) ( $\text{CD}_3\text{OD}$ , 600 MHz, aliphatic region).

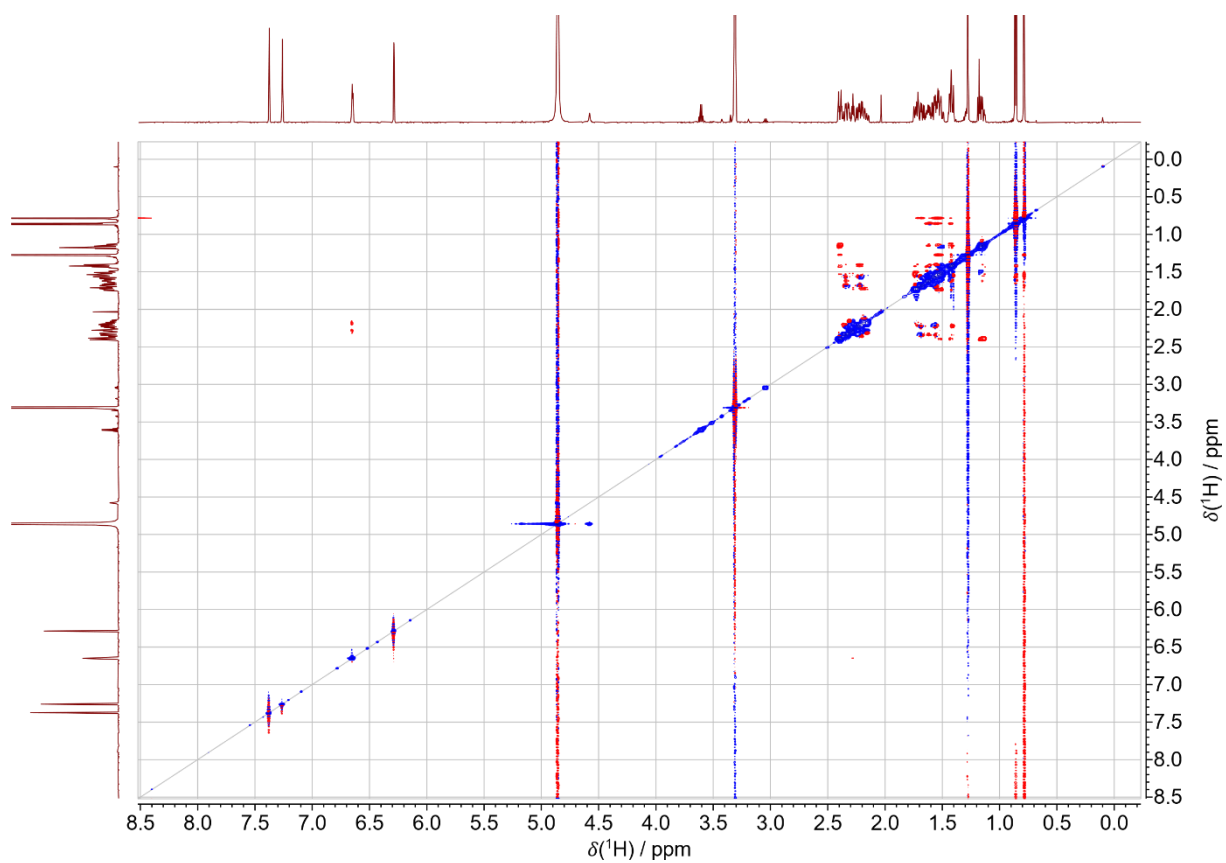

**Figure S13.**  $^1\text{H}$ - $^1\text{H}$  NOESY NMR spectrum of (–)-hardwickiic acid (**1**) ( $\text{CD}_3\text{OD}$ , 600 MHz).

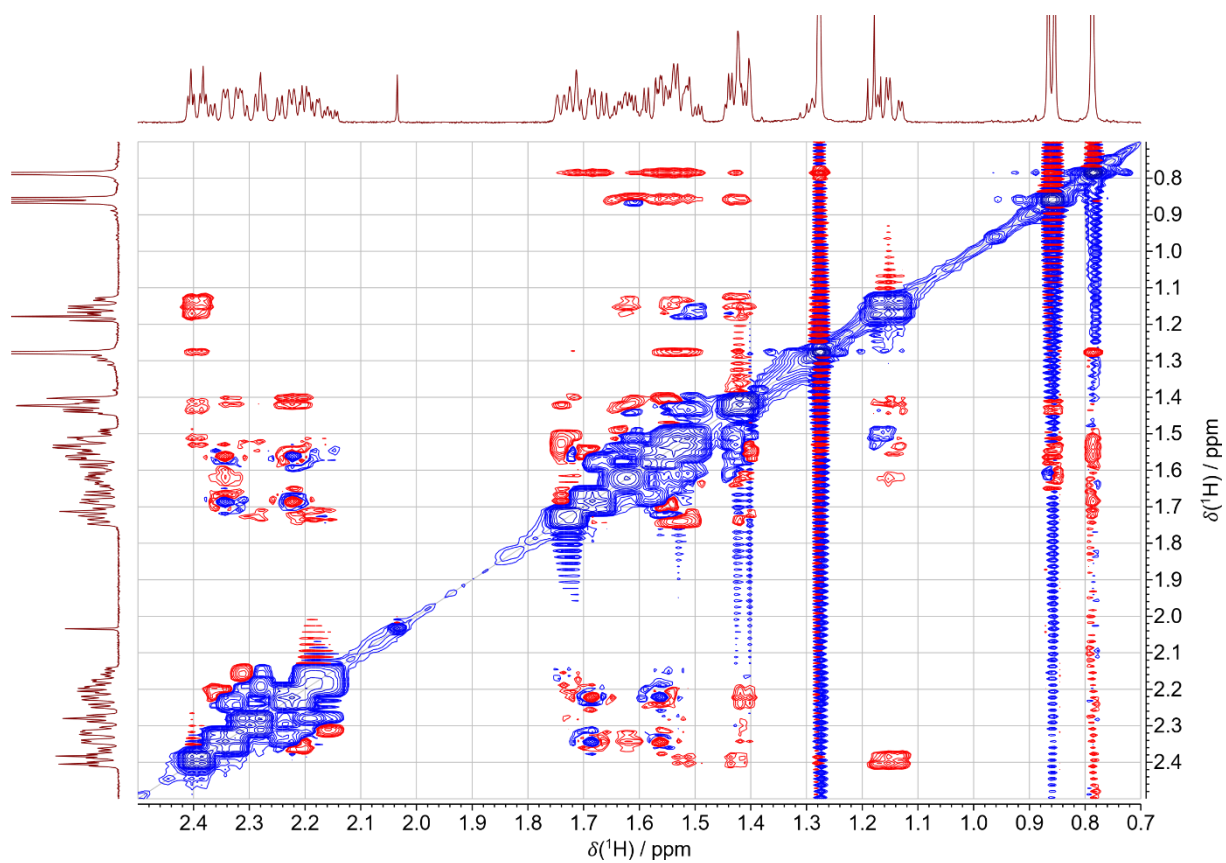

**Figure S14.**  $^1\text{H}$ - $^1\text{H}$  NOESY NMR spectrum of (-)-hardwickiic acid (**1**) ( $\text{CD}_3\text{OD}$ , 600 MHz, aliphatic region).

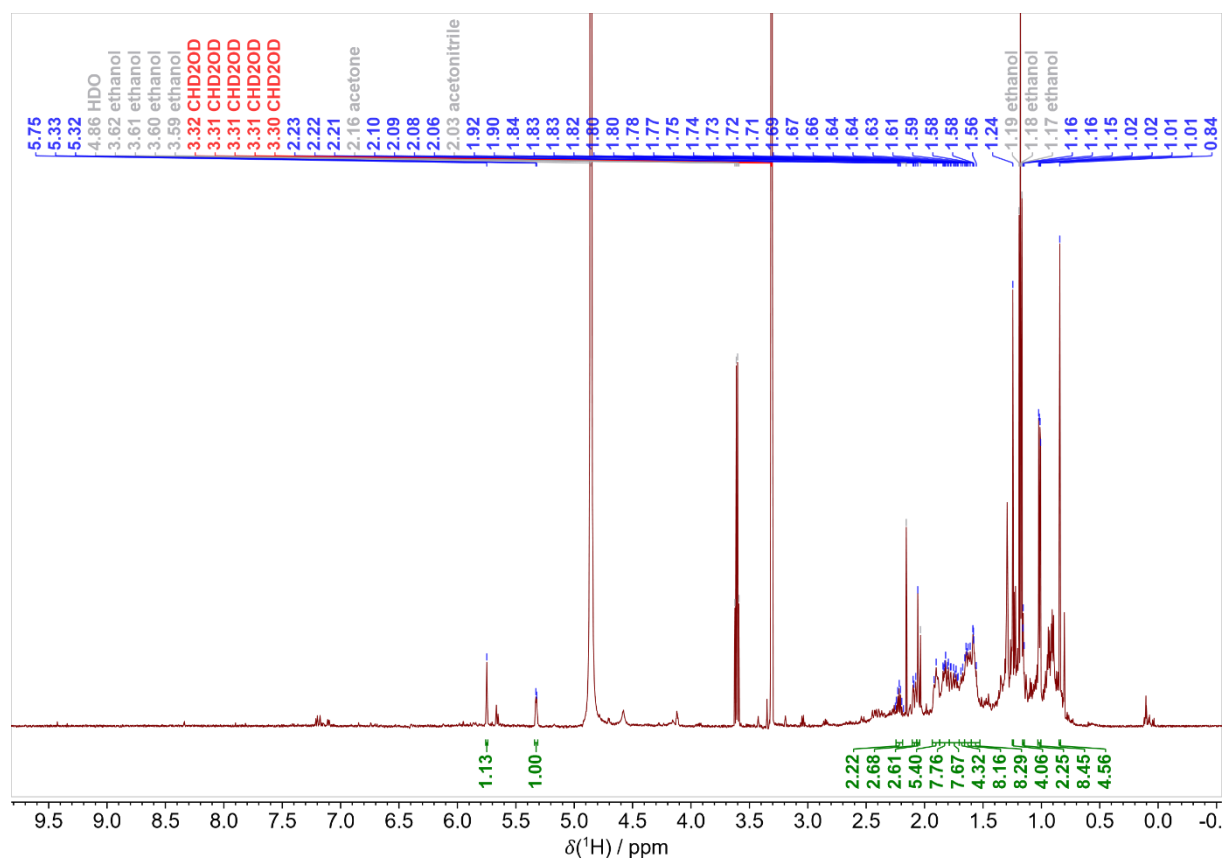

**Figure S15.** <sup>1</sup>H NMR spectrum of (–)-abietic acid (**2**) (CD<sub>3</sub>OD, 600 MHz).

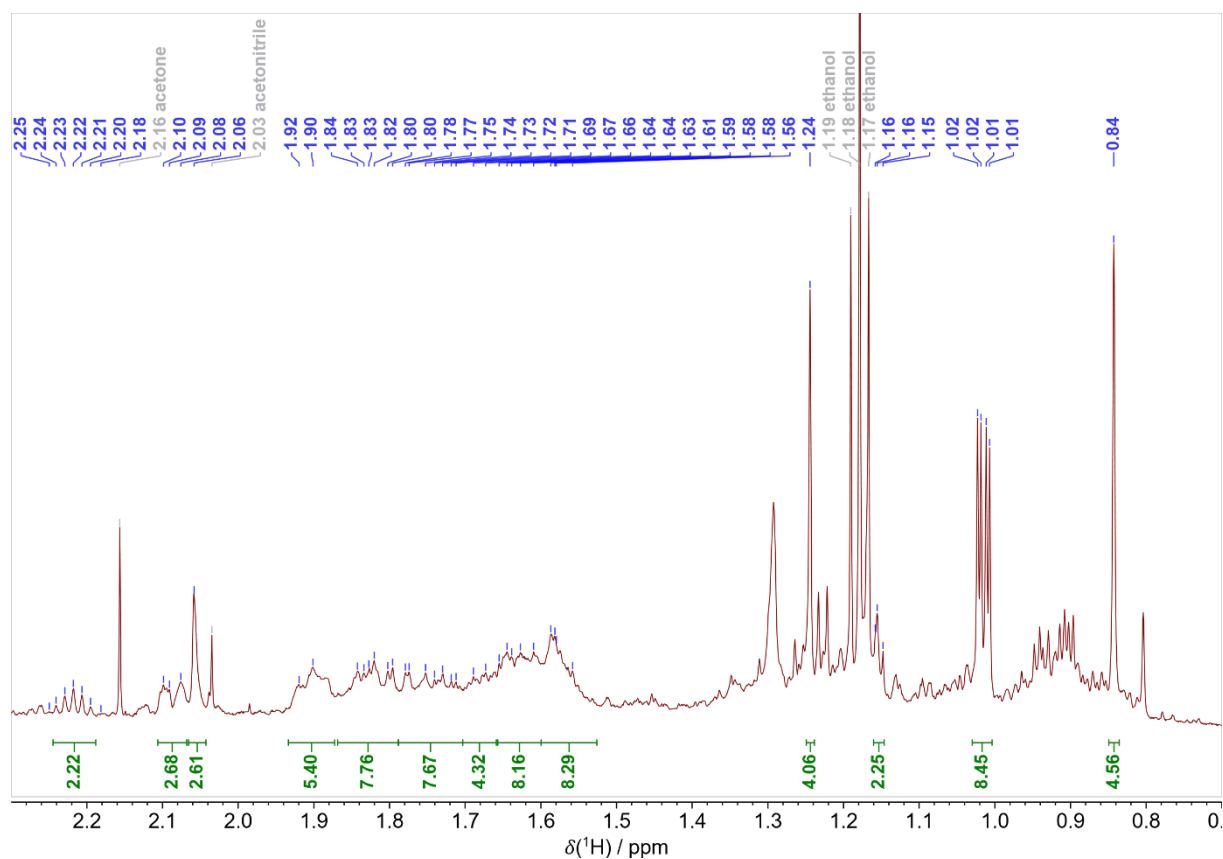

**Figure S16.**  $^1\text{H}$  NMR spectrum of (-)-abietic acid (**2**) ( $\text{CD}_3\text{OD}$ , 600 MHz, aliphatic region).

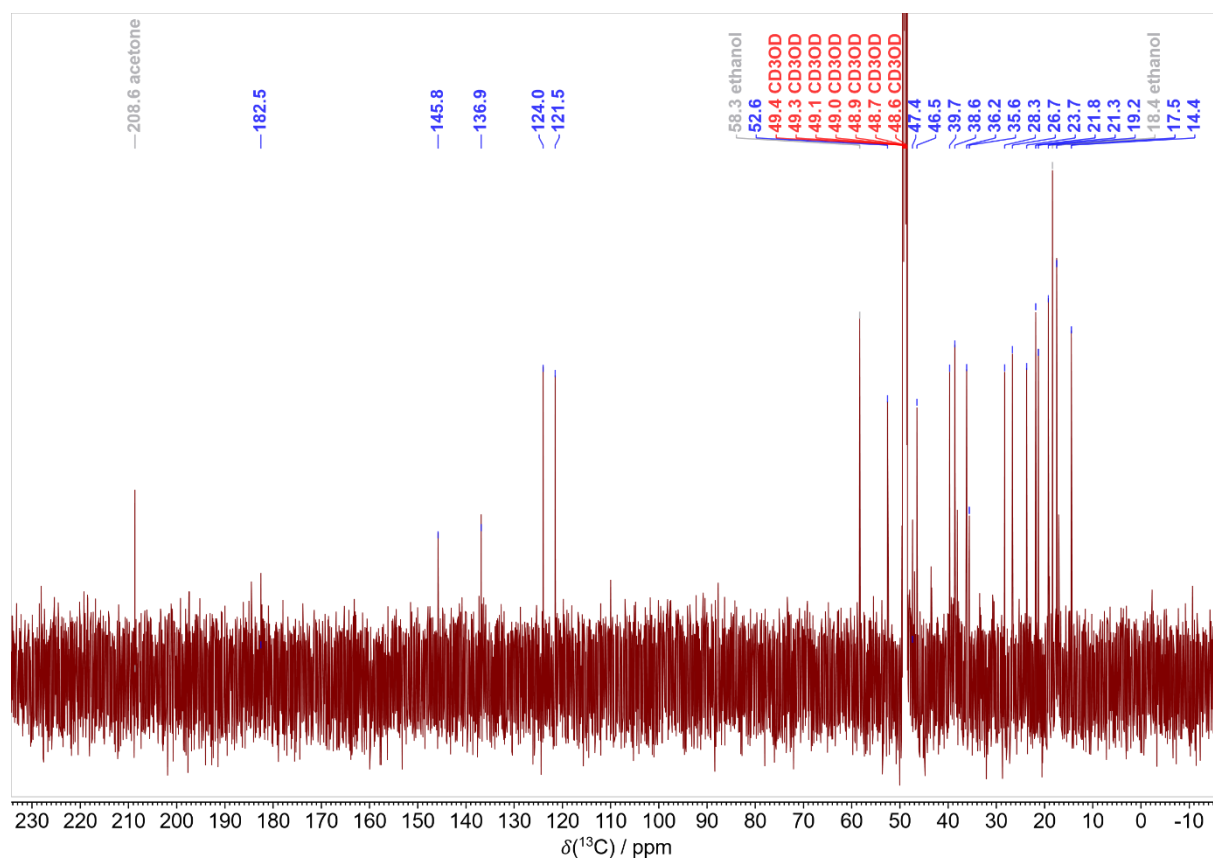

**Figure S17.**  $^{13}\text{C}$  NMR spectrum of (–)-abietic acid (**2**) ( $\text{CD}_3\text{OD}$ , 151 MHz).

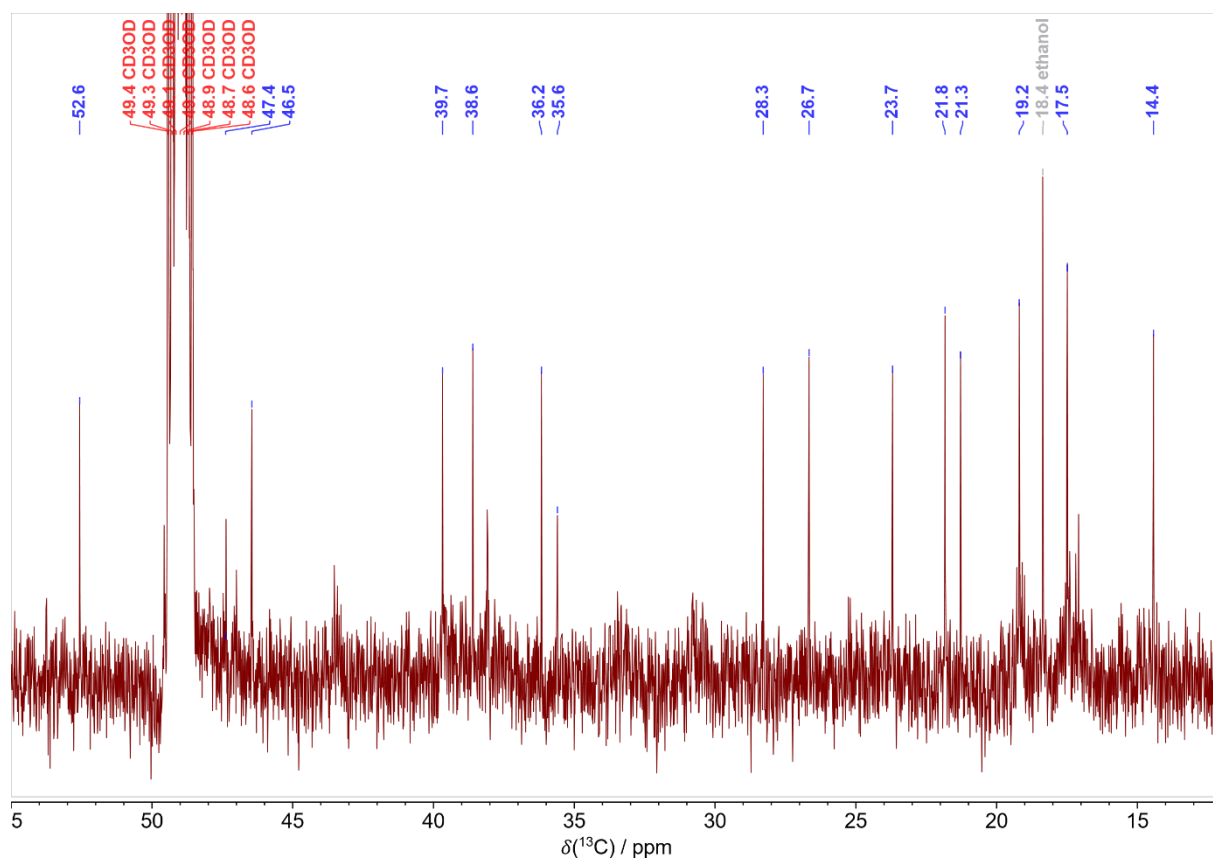

**Figure S18.**  $^{13}\text{C}$  NMR spectrum of (–)-abietic acid (2) ( $\text{CD}_3\text{OD}$ , 151 MHz, aliphatic region).

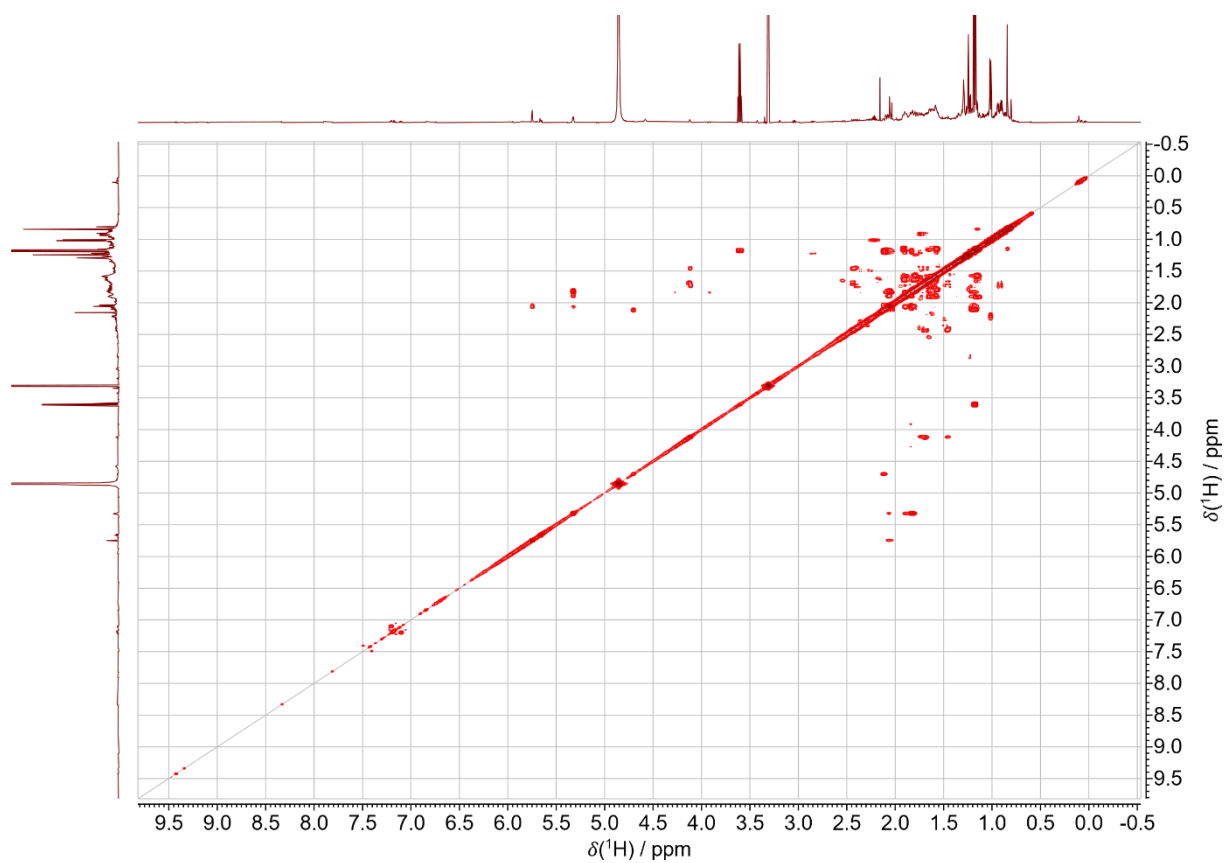

**Figure S19.**  $^1\text{H}$ - $^1\text{H}$  COSY NMR spectrum of (–)-abietic acid (**2**) ( $\text{CD}_3\text{OD}$ , 600 MHz).

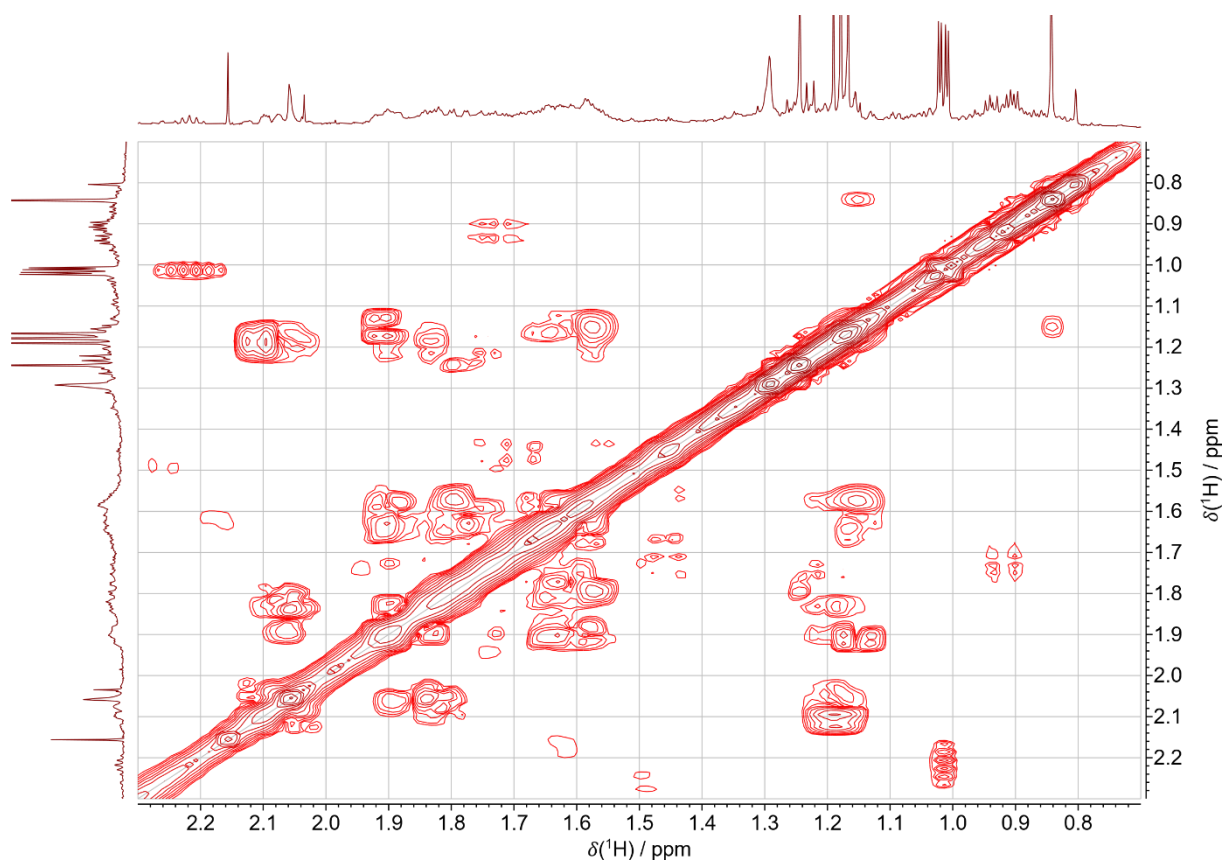

**Figure S20.**  $^1\text{H}$ – $^1\text{H}$  COSY NMR spectrum of (–)-abietic acid (**2**) ( $\text{CD}_3\text{OD}$ , 600 MHz, aliphatic region).

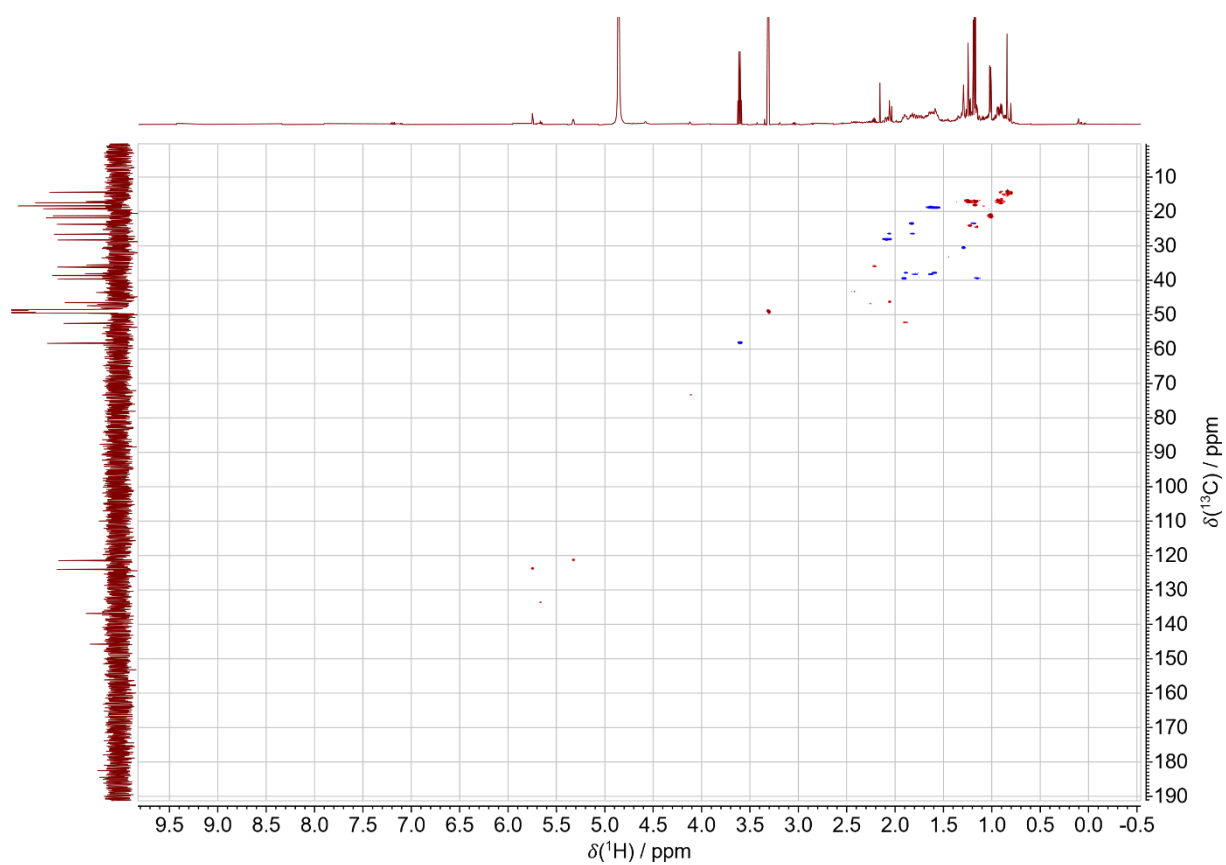

**Figure S21.**  $^1\text{H}$ – $^{13}\text{C}$  edHSQC NMR spectrum of (–)-abietic acid (**2**) ( $\text{CD}_3\text{OD}$ , 600 and 151 MHz).

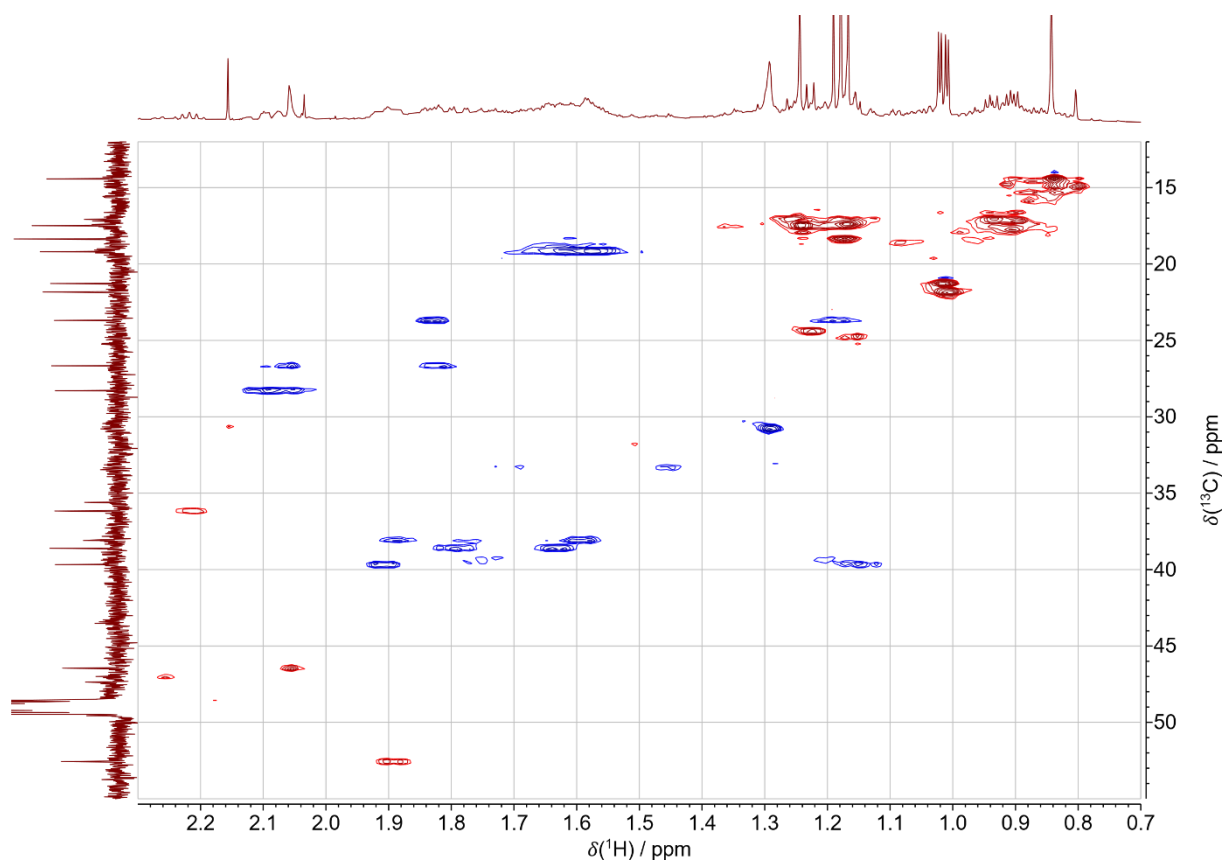

**Figure S22.**  $^1\text{H}$ - $^{13}\text{C}$  edHSQC NMR spectrum of (-)-abietic acid (2) ( $\text{CD}_3\text{OD}$ , 600 and 151 MHz, aliphatic region).

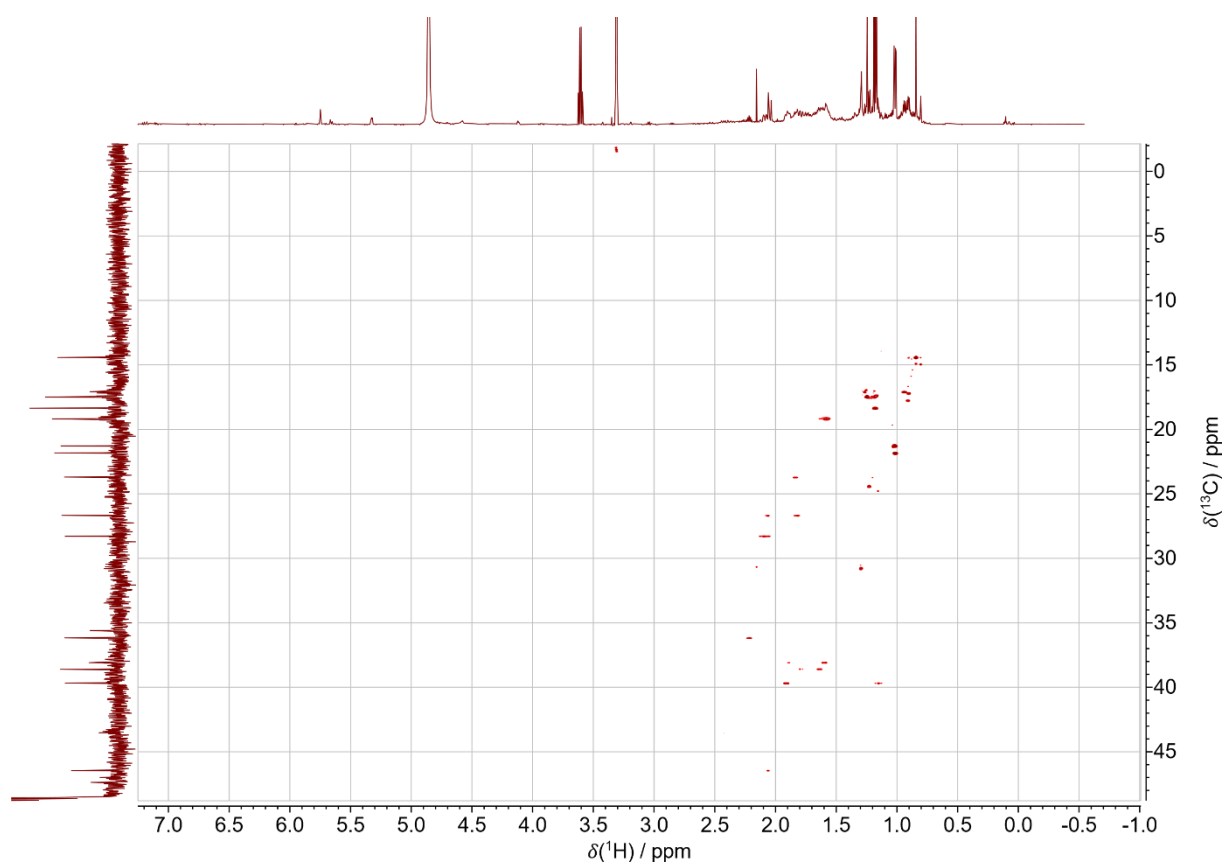

**Figure S23.**  $^1\text{H}$ - $^{13}\text{C}$  bsHSQC NMR spectrum of (–)-abietic acid (**2**) ( $\text{CD}_3\text{OD}$ , 600 and 151 MHz).

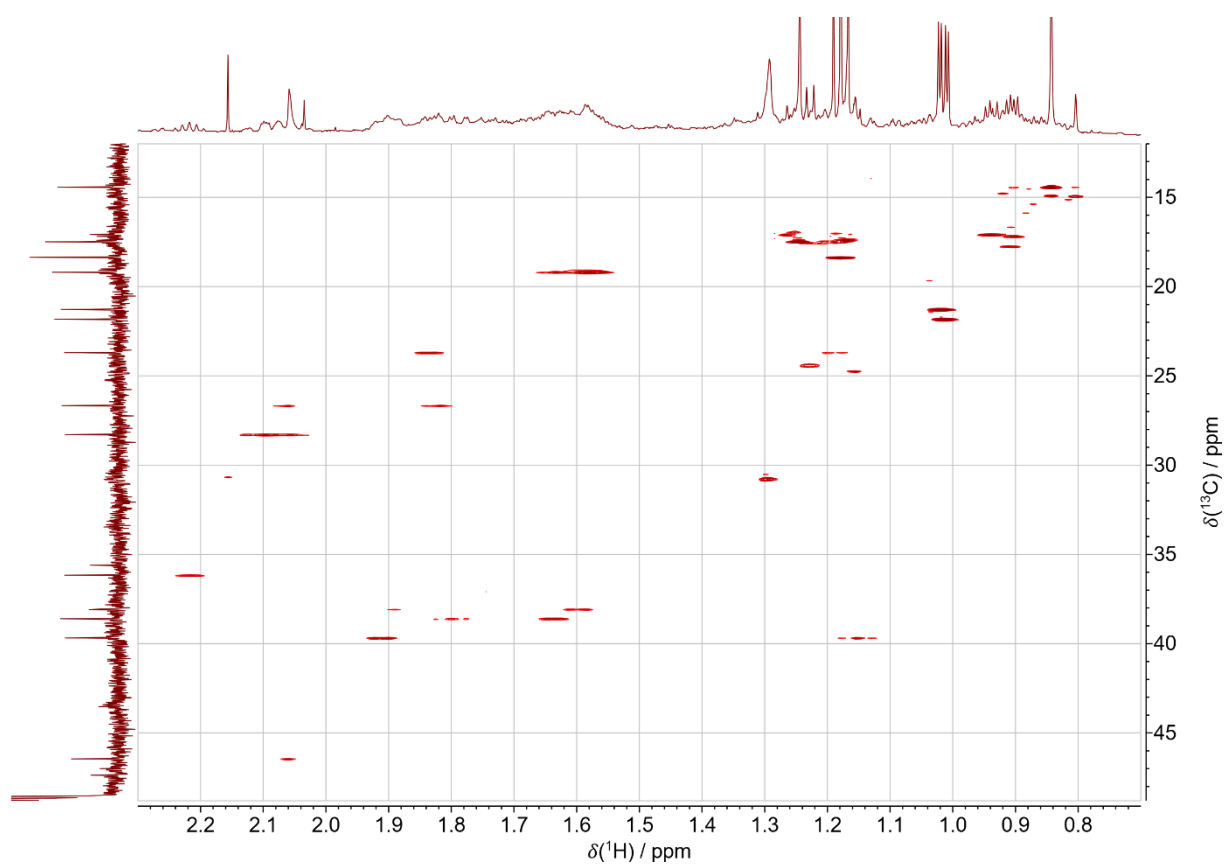

**Figure S24.**  $^1\text{H}$ - $^{13}\text{C}$  bsHSQC NMR spectrum of (–)-abietic acid (**2**) ( $\text{CD}_3\text{OD}$ , 600 and 151 MHz, aliphatic region).

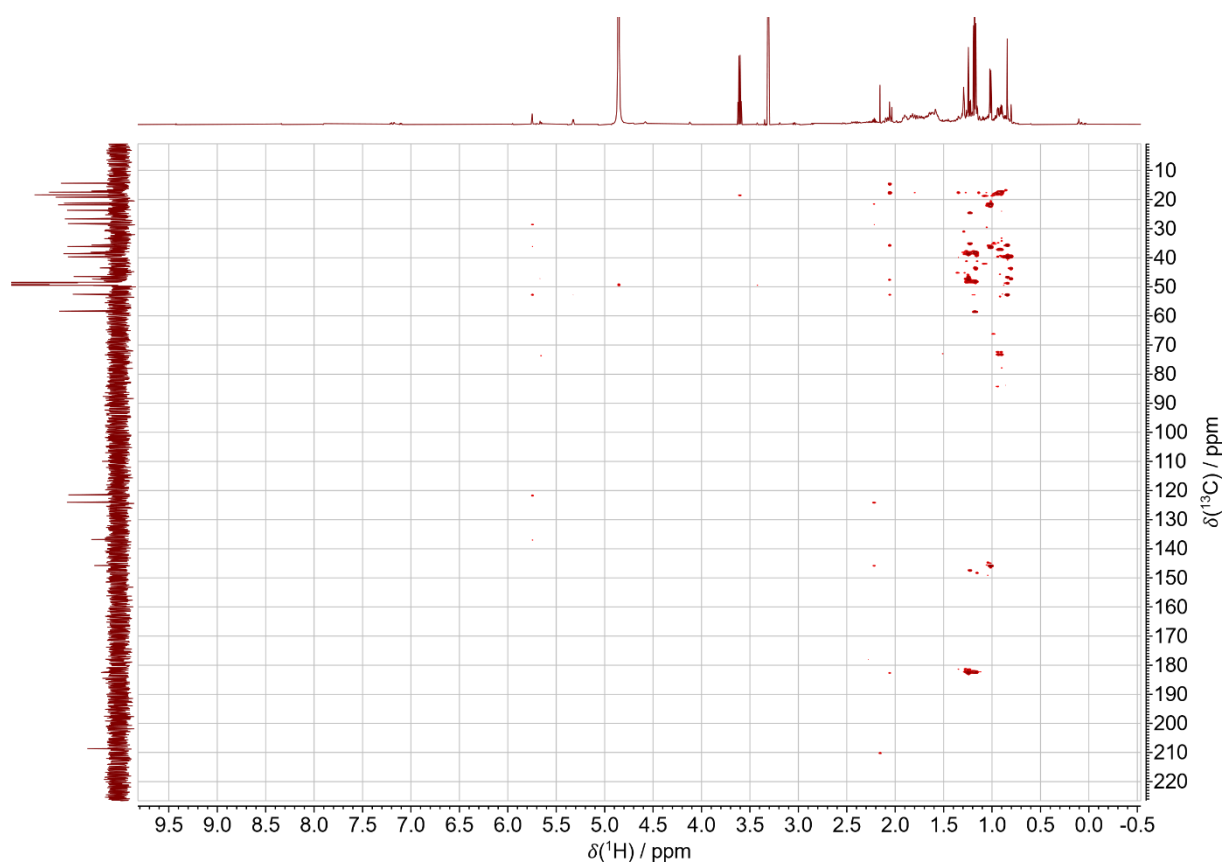

**Figure S25.**  $^1\text{H}$ - $^{13}\text{C}$  HMBC NMR spectrum of (–)-abietic acid (**2**) ( $\text{CD}_3\text{OD}$ , 600 and 151 MHz).

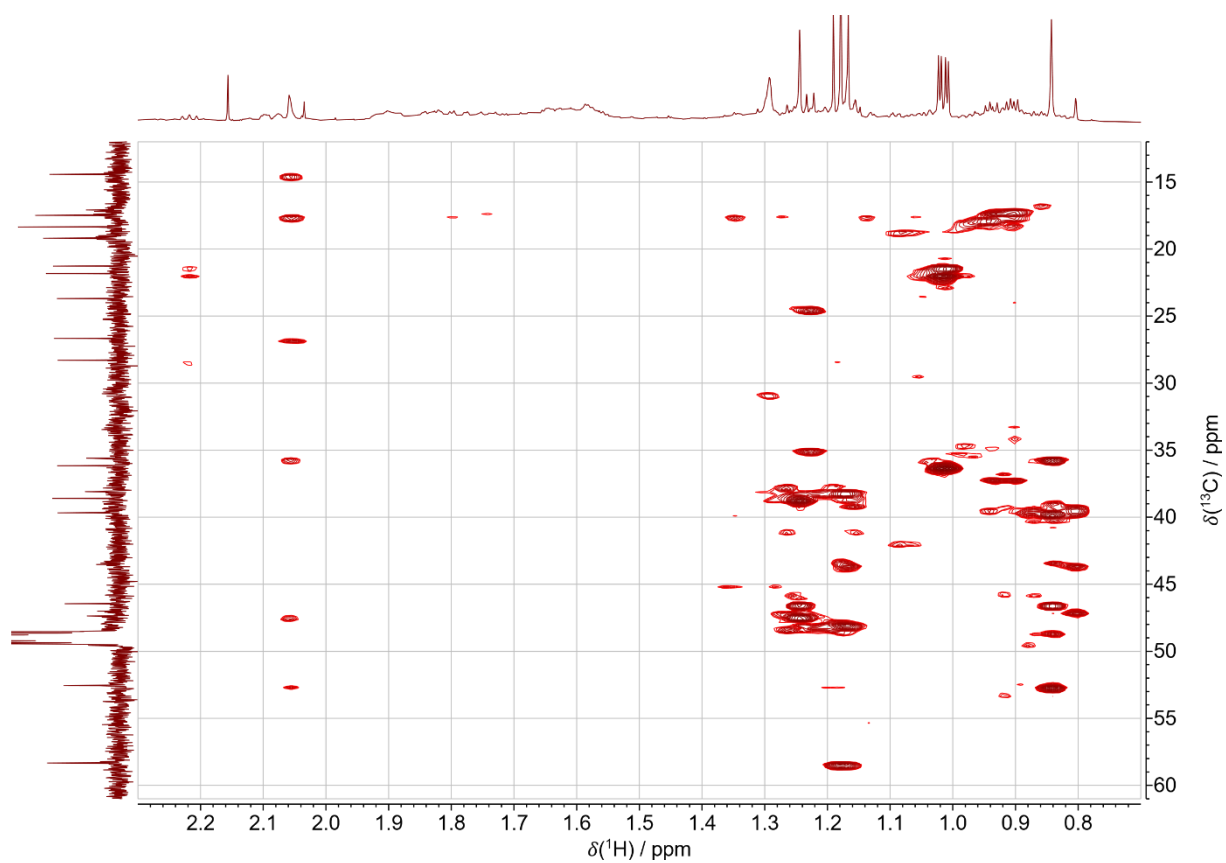

**Figure S26.**  $^1\text{H}$ - $^{13}\text{C}$  HMBC NMR spectrum of (–)-abietic acid (**2**) ( $\text{CD}_3\text{OD}$ , 600 and 151 MHz, aliphatic region).

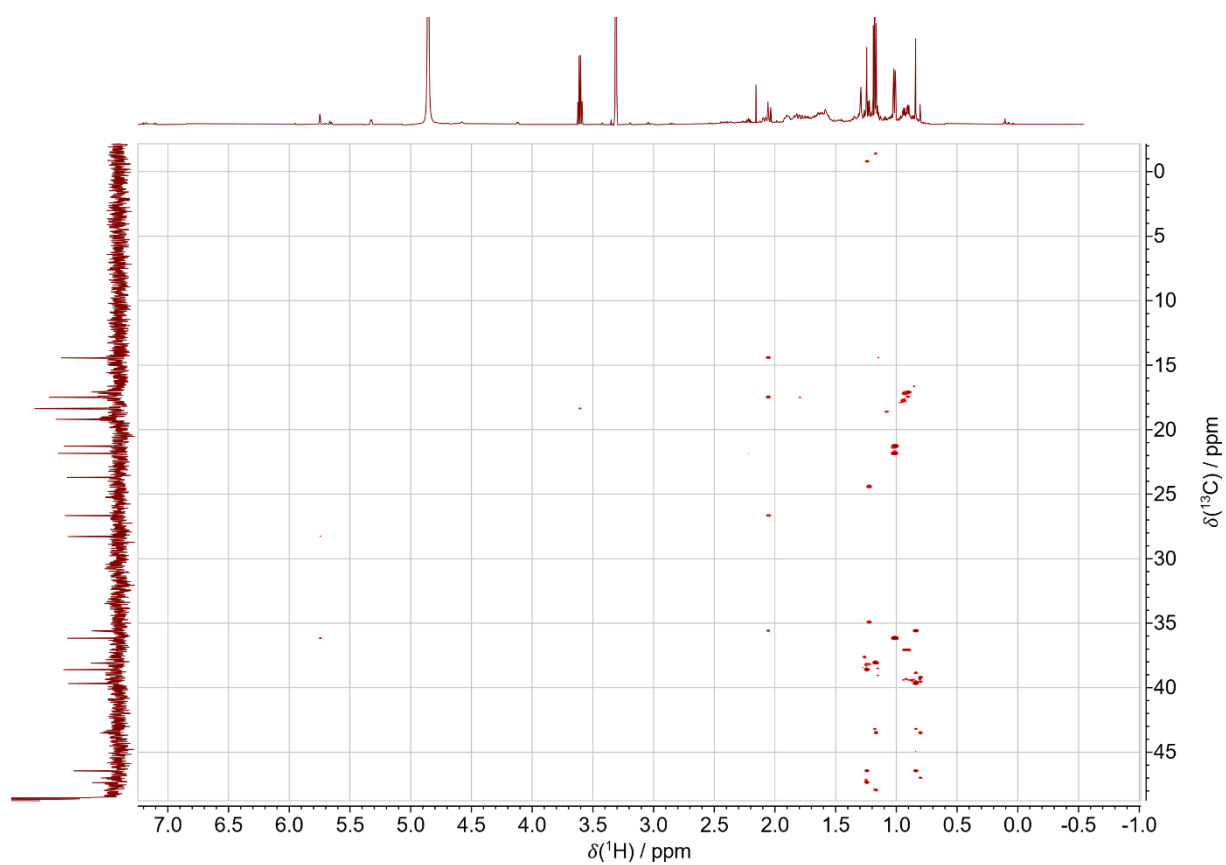

**Figure S27.**  $^1\text{H}$ - $^{13}\text{C}$  bsHMBC NMR spectrum of (–)-abietic acid (**2**) ( $\text{CD}_3\text{OD}$ , 600 and 151 MHz).

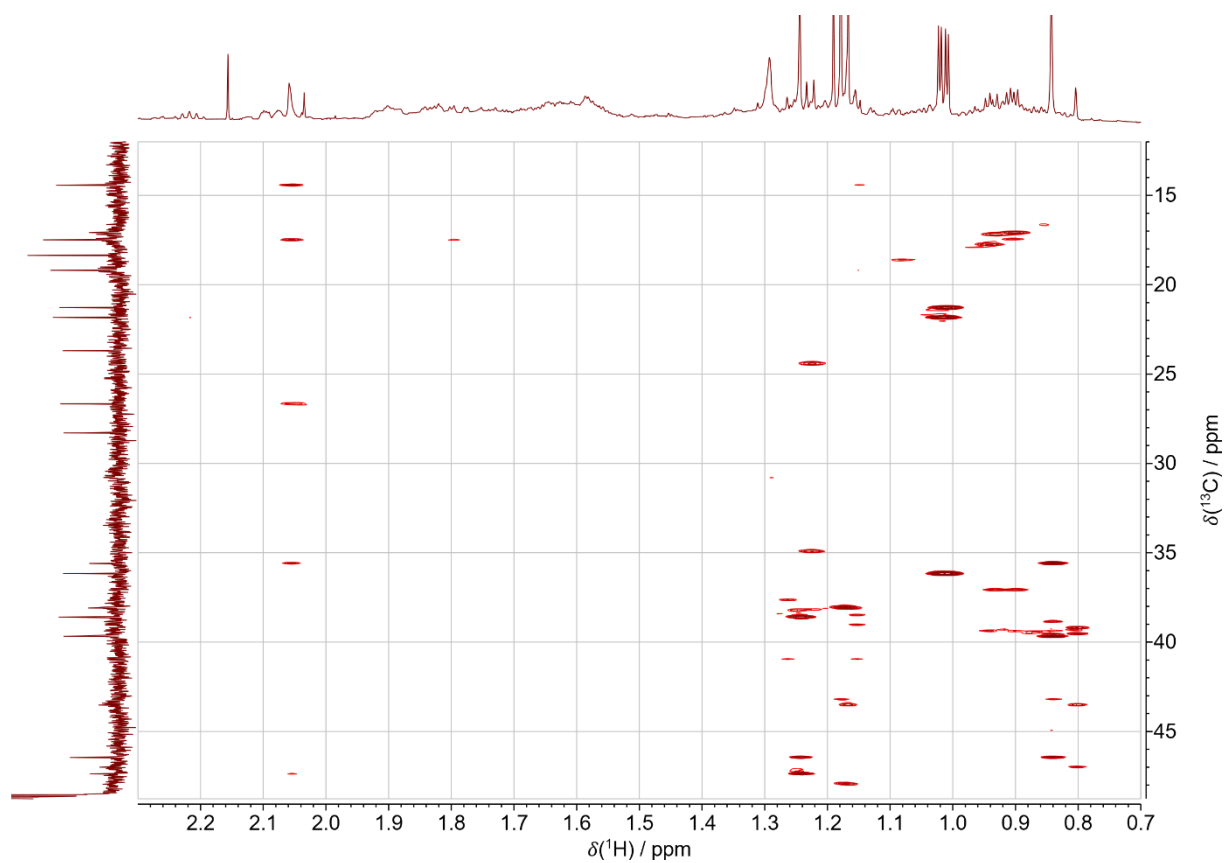

**Figure S28.**  $^1\text{H}$ - $^{13}\text{C}$  bsHMBC NMR spectrum of (-)-abietic acid (**2**) ( $\text{CD}_3\text{OD}$ , 600 and 151 MHz, aliphatic region).

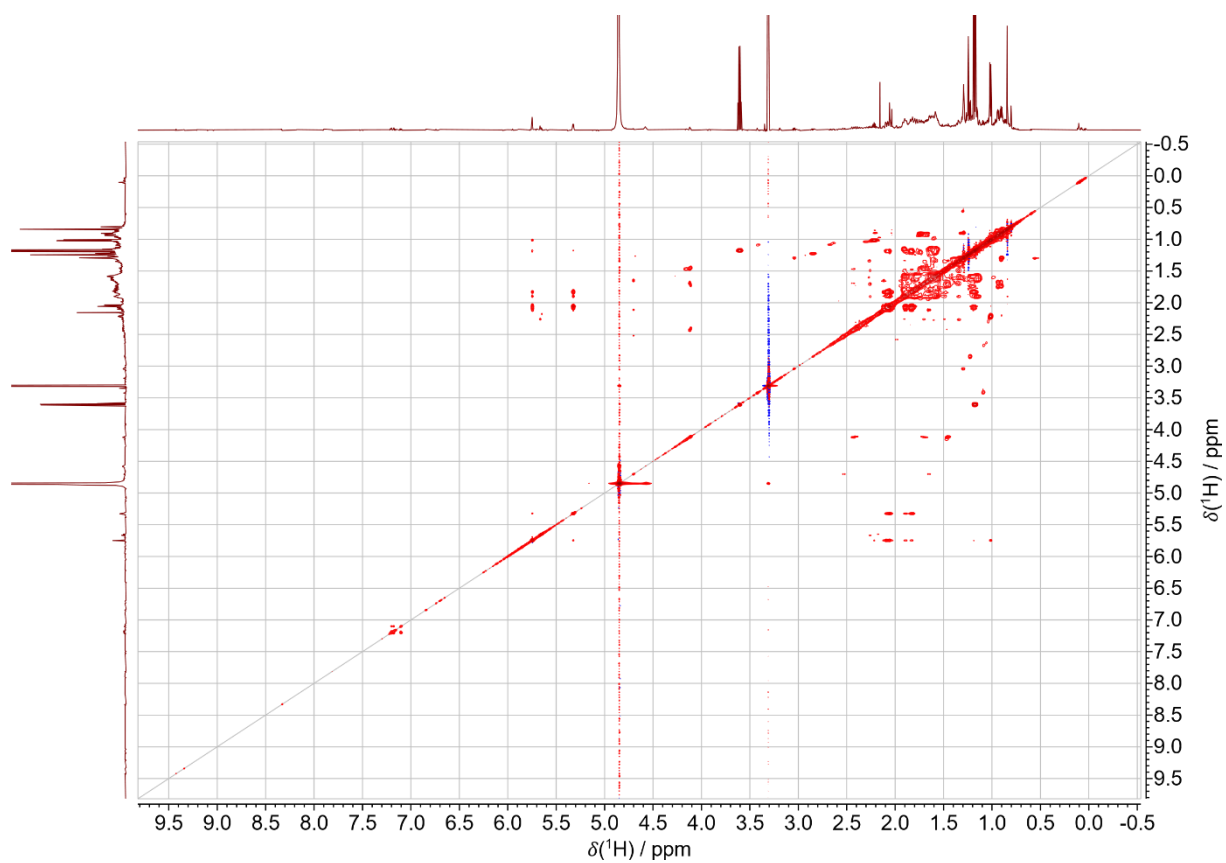

**Figure S29.**  $^1\text{H}$ – $^1\text{H}$  TOCSY NMR spectrum of (–)-abietic acid (**2**) ( $\text{CD}_3\text{OD}$ , 600 MHz).

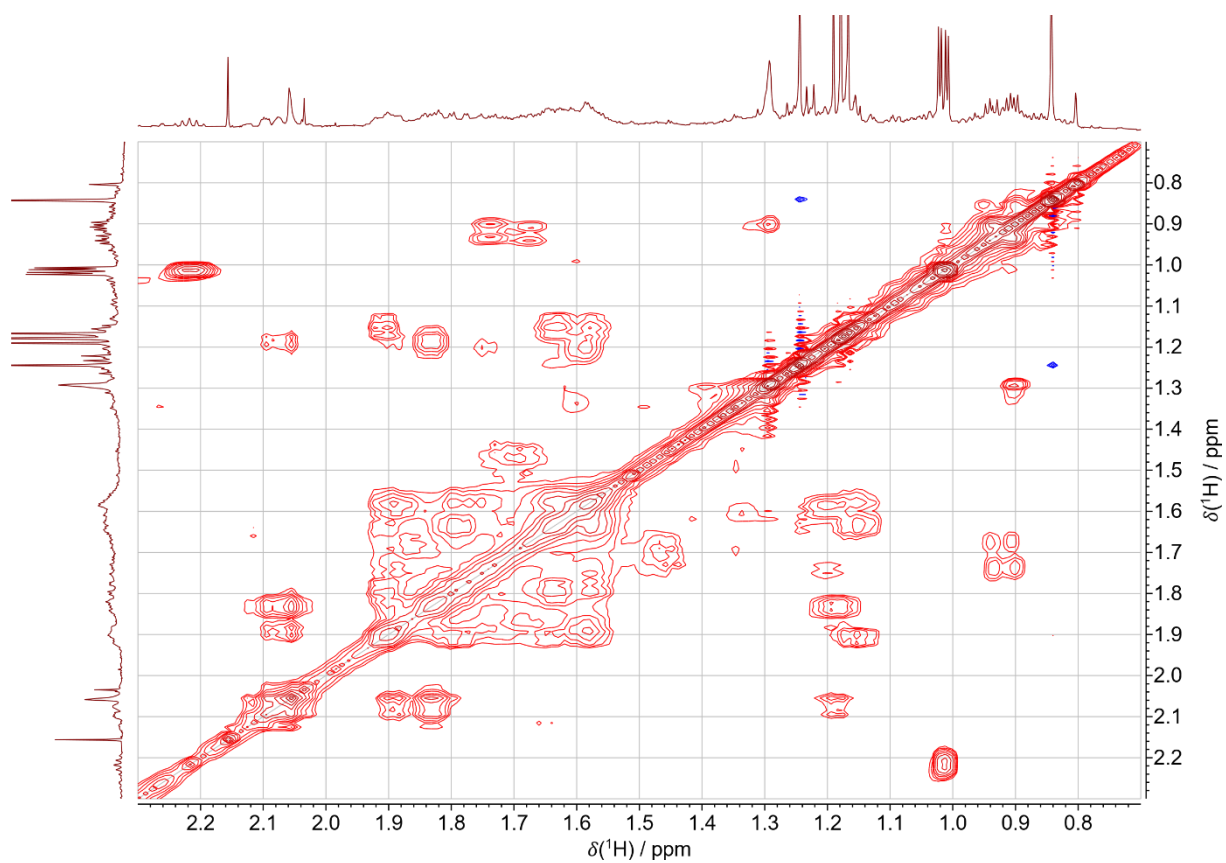

**Figure S30.**  $^1\text{H}$ – $^1\text{H}$  TOCSY NMR spectrum of (–)-abietic acid (**2**) ( $\text{CD}_3\text{OD}$ , 600 MHz, aliphatic region).
